# Supplementary material for: Skeletal Site-specific Effects of Zoledronate on in vivo Bone Remodeling and in vitro BMSCs Osteogenic Activity
Source: PubMed Central journal article supplement (PMC5282532; doi:10.1038/srep36129), 2017-01-31

# Skeletal Site-specific Effects of Zoledronate on *in vivo* Bone Remodeling and *in vitro* BMSCs Osteogenic Activity

Xue Gong<sup>†</sup>, Wanlu Yu<sup>†</sup>, Hang Zhao, Jiansheng Su<sup>\*</sup>, Qing Sheng

## Supplementary FACS data

### Ilium BMSCs:

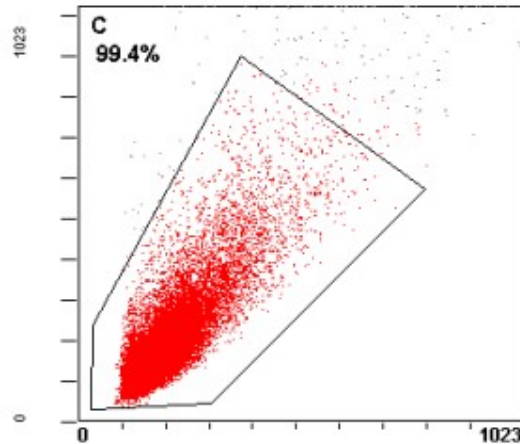

| Region | Number | %Total | %Gated | X-Mean | Y-Mean |
|--------|--------|--------|--------|--------|--------|
| ALL    | 34764  | 100.00 | 100.00 | 193    | 183    |
| C      | 34570  | 99.44  | 99.44  | 191    | 179    |

CD45

CD34

CD44

CD90

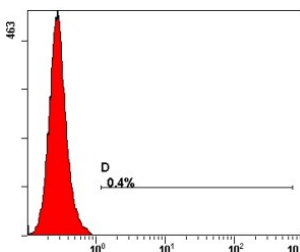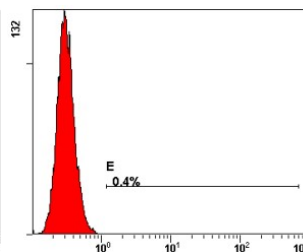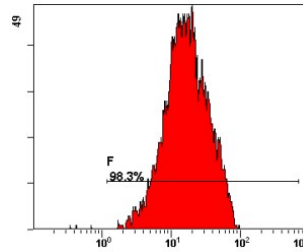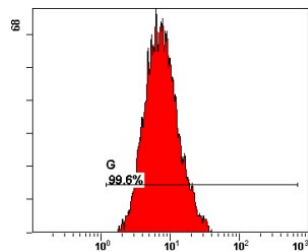

### Jaw BMSCs:

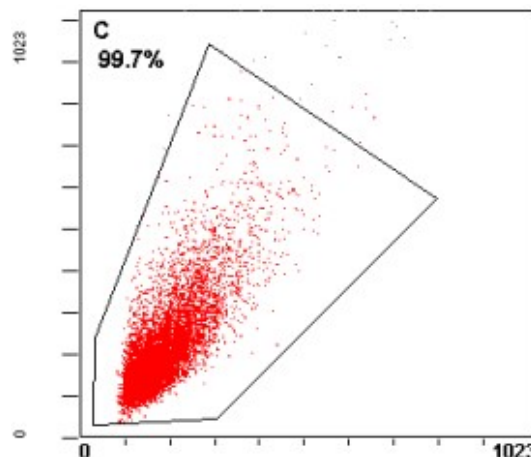

| Region | Number | %Total | %Gated | X-Mean | Y-Mean |
|--------|--------|--------|--------|--------|--------|
| ALL    | 10137  | 100.00 | 100.00 | 181    | 208    |
| C      | 10102  | 99.65  | 99.65  | 180    | 206    |

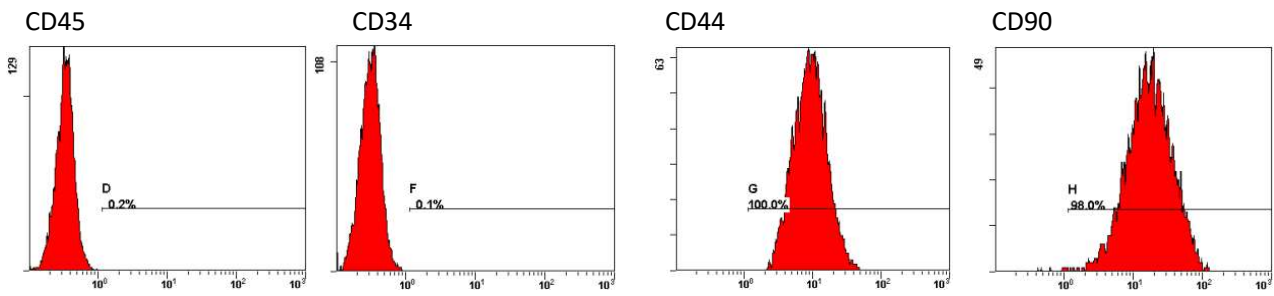

**Tibia BMSCs:**

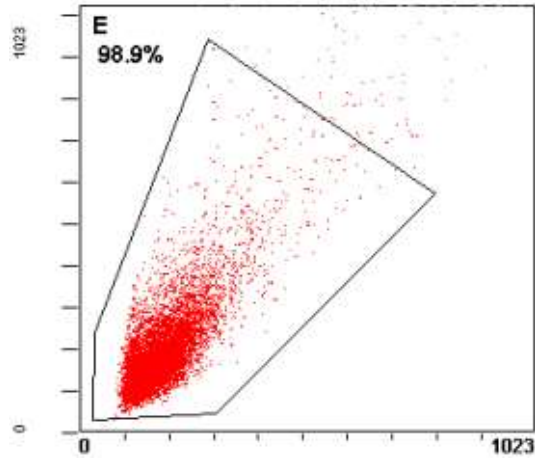

| Region | Number | %Total | %Gated | X-Mean | Y-Mean |
|--------|--------|--------|--------|--------|--------|
| ALL    | 10144  | 100.00 | 100.00 | 185    | 197    |
| E      | 10031  | 98.89  | 98.89  | 179    | 188    |

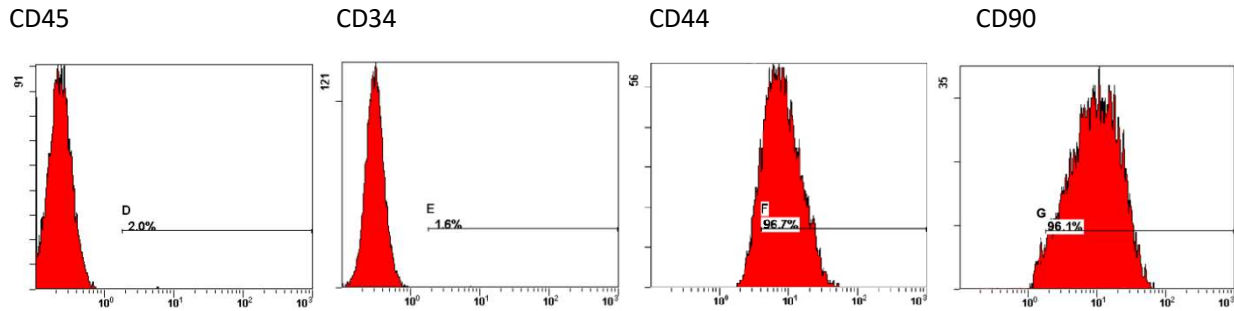

Supplement: srep36129-s1.pdf [file srep36129-s1.pdf]
